# Supplementary material for: A cell membrane-targeting AIE photosensitizer as a necroptosis inducer for boosting cancer theranostics
Source: Royal Society of Chemistry journal article supplement (doi:10.1039/d2sc01260j), 2022-01-01
Supplement: d2sc01260j1.pdf [file d2sc01260j1.pdf]

# Cell membrane-targeting AIE photosensitizer as necroptosis inducer for boosting cancer theranostics

Niu Niu,<sup>†ab</sup> Ying Yu,<sup>†c</sup> Zhijun Zhang,<sup>ab</sup> Miaomiao Kang,<sup>ab</sup> Lei Wang,<sup>ab</sup> Zhen Zhao,<sup>\*c</sup>  
Dong Wang<sup>\*ab</sup> and Ben Zhong Tang<sup>\*c</sup>

## Table of Contents

|                                                                                         |     |
|-----------------------------------------------------------------------------------------|-----|
| <b>Scheme S1.</b> Synthesis routine of TBMPE and TBMPEI.                                | S1  |
| <b>Fig. S1</b> <sup>1</sup> H NMR spectrum of TBMPE in CDCl <sub>3</sub> .<br>S1        | S1  |
| <b>Fig. S2</b> <sup>13</sup> C NMR spectrum of TBMPE in CDCl <sub>3</sub> .             | S2  |
| <b>Fig. S3</b> HRMS spectrum of TBMPE.                                                  | S2  |
| <b>Fig. S4</b> <sup>1</sup> H NMR spectrum of TBMPEI in CDCl <sub>3</sub> .             | S3  |
| <b>Fig. S5</b> <sup>13</sup> C NMR spectrum of TBMPEI in CDCl <sub>3</sub> .            | S3  |
| <b>Fig. S6</b> HRMS spectrum of TBMPEI.                                                 | S4  |
| <b>Fig. S7</b> AIE curve of TBMPE in THF/H <sub>2</sub> O mixture.                      | S4  |
| <b>Fig. S8</b> Absorption and emission spectra of TBMPE and TBMPEI in solid states.     | S4  |
| <b>Fig. S9</b> Fluorescence spectra change of DCFH with different photosensitizers.     | S5  |
| <b>Fig. S10</b> Absorption spectra change of ABDA with different photosensitizers.      | S5  |
| <b>Fig. S11</b> Fluorescence spectra change of HPF with different photosensitizers.     | S5  |
| <b>Fig. S12</b> Fluorescence spectra change of DHR 123 with different photosensitizers. | S5  |
| <b>Fig. S13</b> DFT calculation of TBMPE and TBMPEI.                                    | S6  |
| <b>Fig. S14</b> CLSM image of cells stained for different time.                         | S6  |
| <b>Fig. S15</b> CLSM image of cells stained with TBMPE.                                 | S6  |
| <b>Fig. S16</b> Photostability of TBMPEI.                                               | S7  |
| <b>Fig. S17</b> Cytotoxicity of TBMPE towards 4T1 cells.                                | S7  |
| <b>Fig. S18</b> MDA release assay of 4T1 cells after different treatment.               | S7  |
| <b>Fig. S19</b> CLSM images of cell stained with Hoechst 33342 with irradiation.        | S7  |
| <b>Fig. S20</b> CLSM images of cells after long time light irradiation.                 | S8  |
| <b>Fig. S21</b> Live/Dead staining of 4T1 cells.                                        | S8  |
| <b>Fig. S22</b> LDH release of 4T1 cells after various treatment.                       | S9  |
| <b>Fig. S23</b> Characterization of TBMPEI dots.                                        | S9  |
| <b>Fig. S24</b> <i>Ex vivo</i> fluorescence image of mice after 24 h injection.         | S10 |
| <b>Fig. S25</b> Photos of tumors after 14-days treatment.                               | S10 |
| <b>Fig. S26</b> Body-weight change of mice.                                             | S10 |
| <b>Fig. S27</b> H&E staining of mice major organs in different groups.                  | S10 |
| <b>Fig. S28</b> Hemolytic assay of TBMPEI dots.                                         | S10 |
| <b>Fig. S29</b> Quantum yield and lifetime of TBMPE and TBMPEI                          | S10 |

## Supporting Figures

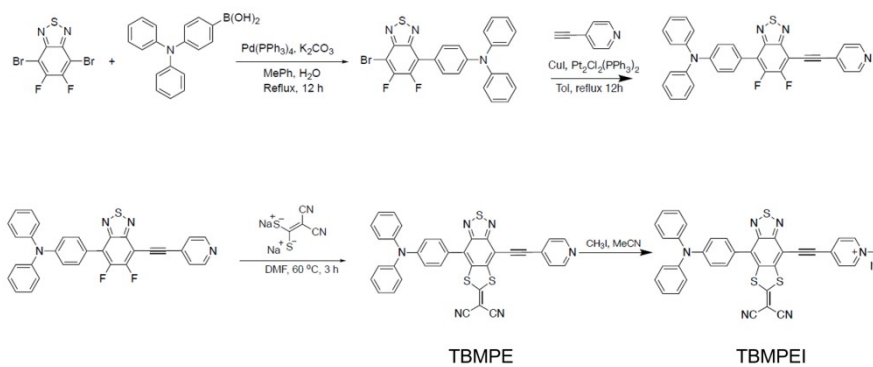

**Scheme S1.** Synthesis routine of TBMPE and TBMPEI.

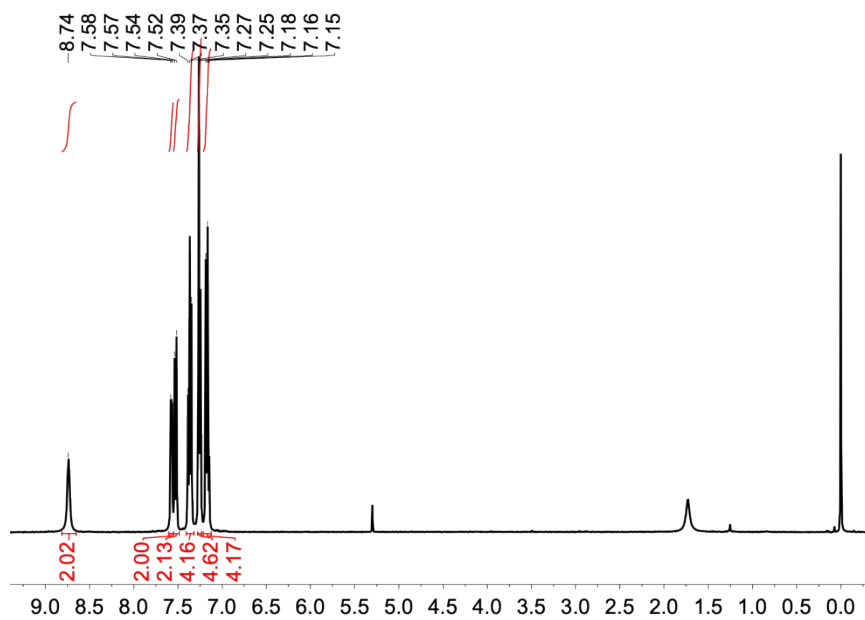

**Fig. S1**  $^1\text{H}$  NMR spectrum of TBMPE in  $\text{CDCl}_3$ .

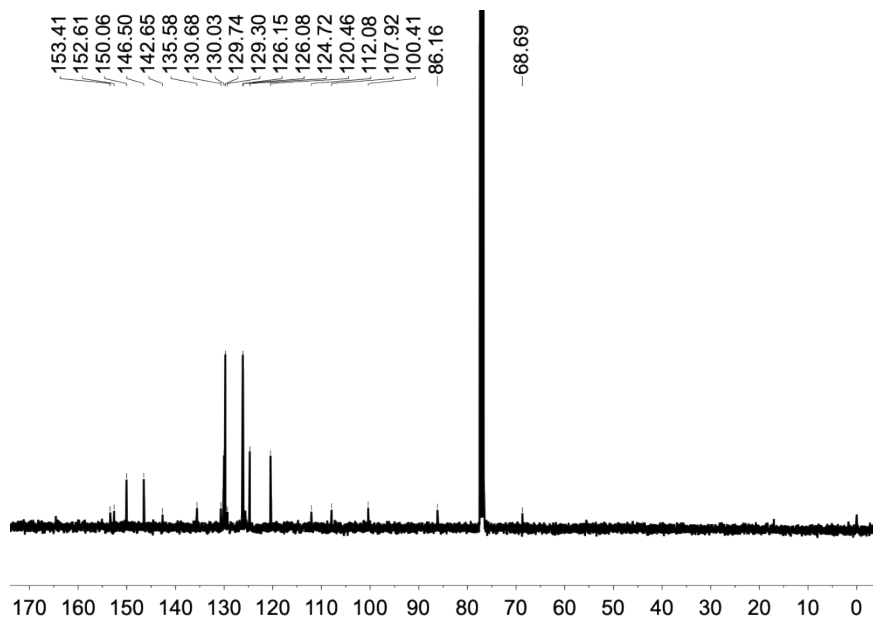

**Fig. S2**  $^{13}\text{C}$  NMR spectrum of TBMPE in  $\text{CDCl}_3$ .

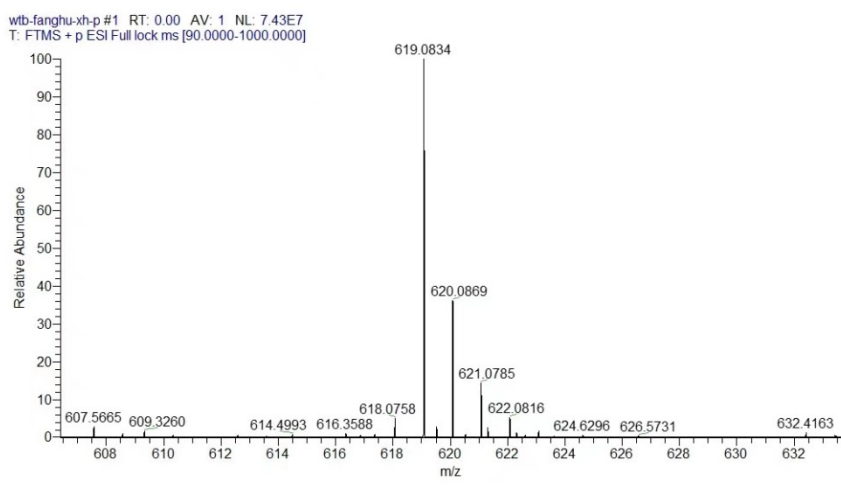

**Fig. S3** HRMS spectrum of TBMPE.

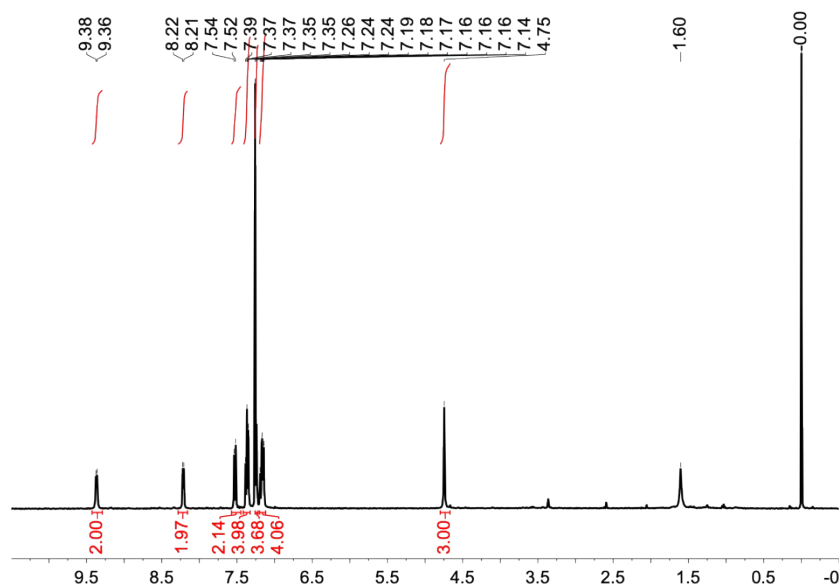

Fig. S4  $^1\text{H}$  NMR spectrum of TBMPEI in  $\text{CDCl}_3$ .

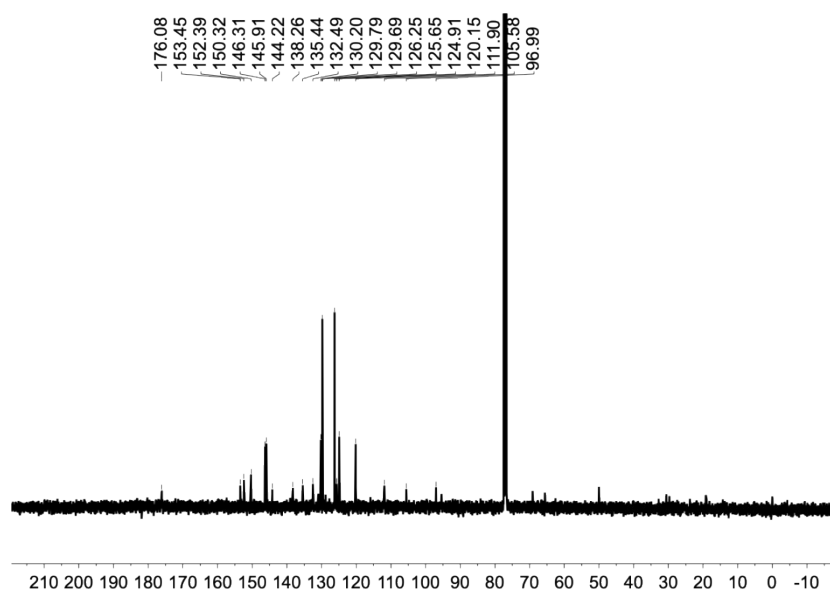

Fig. S5  $^{13}\text{C}$  NMR spectrum of TBMPEI in  $\text{CDCl}_3$ .

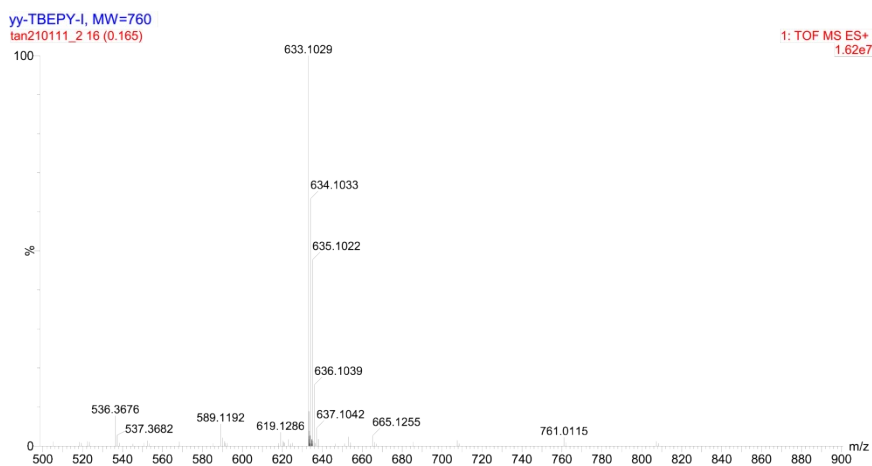

**Fig. S6** HRMS spectrum of TBMPEI.

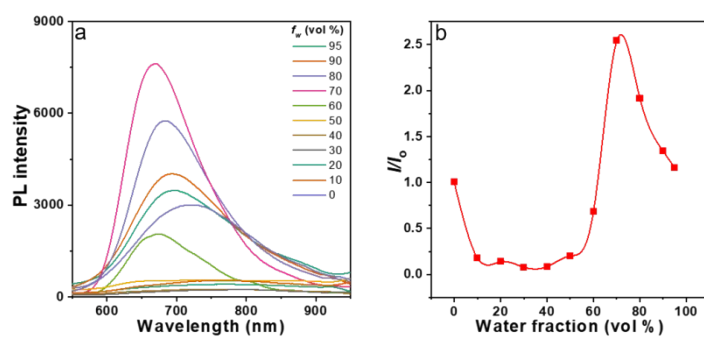

**Fig. S7** (A) Fluorescence spectrum of TBMPE ( $10 \mu\text{M}$ ) in THF/ $\text{H}_2\text{O}$  mixture with different water fraction. (F) Plots of relative PL intensity ( $I/I_0$ ) of TBMPE versus water fraction.

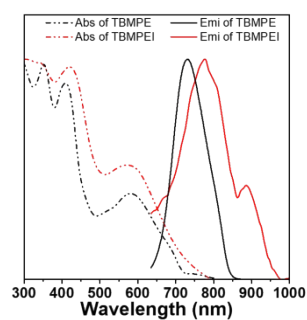

**Fig. S8** Absorption and emission spectrum of TBMPE and TBMPEI in solid states.

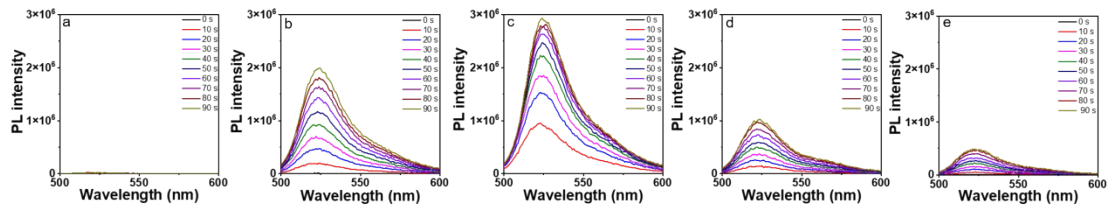

**Fig. S9** Fluorescence spectrum of (a) DCFH (10  $\mu\text{M}$ ) and in the presence of (b) TBMPE (1  $\mu\text{M}$ ), (c) TBMPEI (1  $\mu\text{M}$ ), (d) Rose bengal (1  $\mu\text{M}$ ), (e) Ce 6 (1  $\mu\text{M}$ ) in PBS after irradiation for different time. Ex: 490 nm.

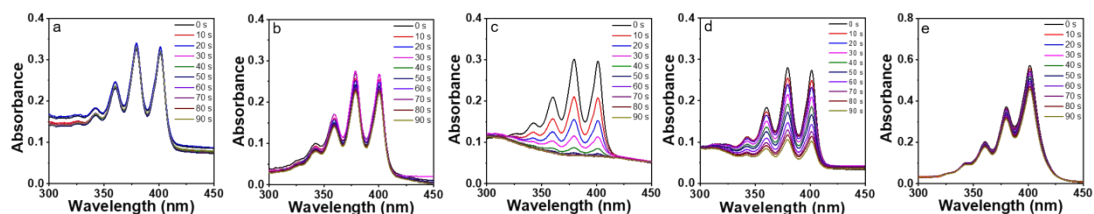

**Fig. S10** Absorption spectrum of (a) ABDA (20  $\mu\text{M}$ ) and in the presence of (b) TBMPE (2  $\mu\text{M}$ ), (c) TBMPEI (2  $\mu\text{M}$ ), (d) Rose Bengal (2  $\mu\text{M}$ ), (e) Ce 6 (2  $\mu\text{M}$ ) in PBS after irradiation for different time.

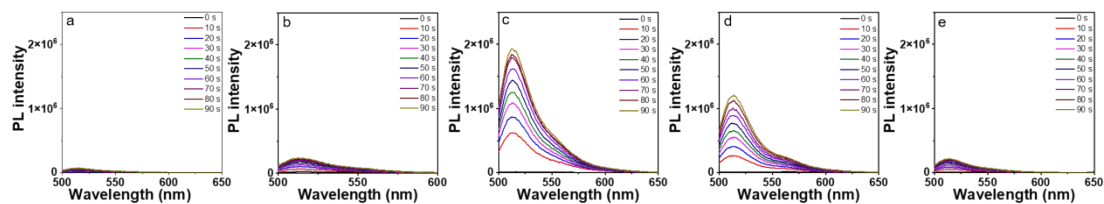

**Fig. S11** Fluorescence spectrum of (a) HPF (10  $\mu\text{M}$ ) and in the presence of (b) TBMPE (2  $\mu\text{M}$ ), (c) TBMPEI (2  $\mu\text{M}$ ), (d) Rose bengal (2  $\mu\text{M}$ ), (e) Ce 6 (2  $\mu\text{M}$ ) in PBS after irradiation for different time. Ex:500 nm.

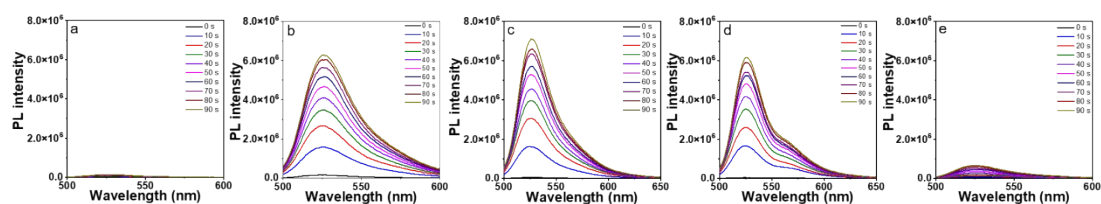

**Fig. S12** Fluorescence spectrum of (a) DHR 123 (10  $\mu\text{M}$ ) and in the presence of (b) TBMPE (2  $\mu\text{M}$ ), (c) TBMPEI (2  $\mu\text{M}$ ), (d) Rose Bengal (2  $\mu\text{M}$ ), (e) Ce 6 (2  $\mu\text{M}$ ) in PBS after irradiation for different time. Exi: 490 nm.

| TBMEP |        |    |        | TBMEPI          |    |        |    |        |                 |
|-------|--------|----|--------|-----------------|----|--------|----|--------|-----------------|
|       | eV     |    | eV     | $\Delta E_{ST}$ |    | eV     |    | eV     | $\Delta E_{ST}$ |
| S5    | 4.0325 | T5 | 3.1608 | 0.8717          | S5 | 2.8946 | T5 | 2.8464 | 0.0482          |
| S4    | 3.7934 | T4 | 2.9876 | 0.8058          | S4 | 2.8435 | T4 | 2.3960 | 0.4475          |
| S3    | 3.5085 | T3 | 2.5886 | 0.9199          | S3 | 2.6593 | T3 | 2.2664 | 0.3929          |
| S2    | 3.2379 | T2 | 2.4405 | 0.7974          | S2 | 2.2088 | T2 | 1.9398 | 0.269           |
| S1    | 2.3425 | T1 | 1.1389 | 1.2036          | S1 | 0.9496 | T1 | 0.9101 | 0.0395          |

**Fig. S13** DFT calculations of molecular energy at various states and responding  $\Delta E_{st}$ . Calculation was performed by DFT theory calculations at the m062x/6-31g\* level using the Gaussian 09 program.

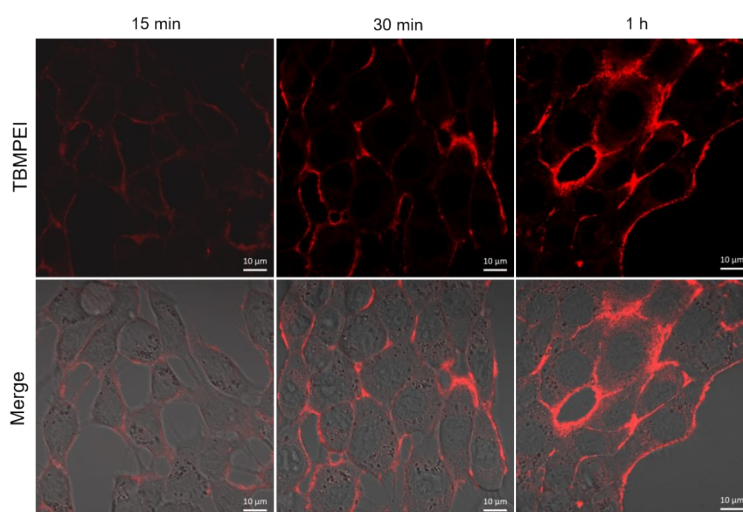

**Fig. S14** CLSM images of 4T1 cells after incubation with TBMEPI for various time periods. Scale bar: 10 μm.

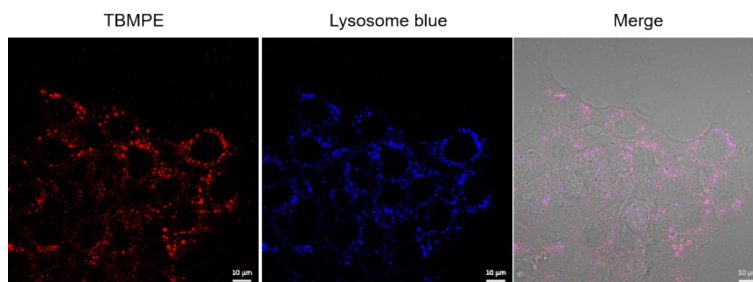

**Fig. S15** CLSM images of 4T1 cells after incubation with TBMEPI (10 μM, 30 min) and then co-stained with lysosome blue (2 μM, 30 min). Scale bar: 10 μm.



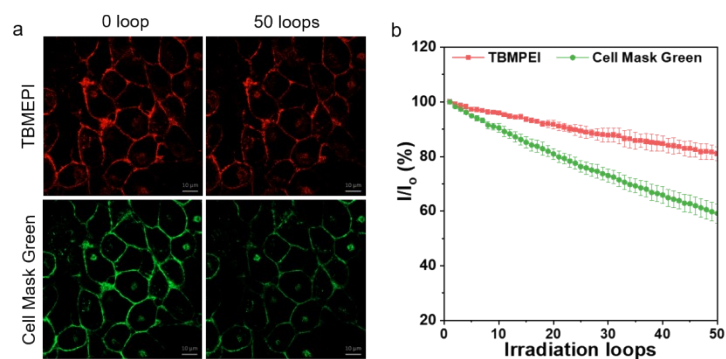

**Fig. S16** Photostability comparison of TBMPEI (5 μM) and Cell Mask Green (2 μM). (a) CLSM images of 4T1 cells stained with TBMPEI and Cell Mask Green before and after 50 loops of 488 nm laser (1% intensity) irradiation.

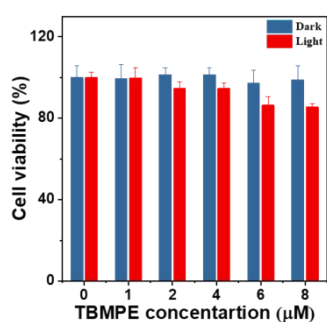

**Fig. S17** Cytotoxicity of TBMPE towards 4T1 cells.

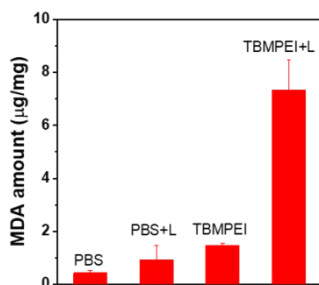

**Fig. S18** MDA contents of 4T1 cells after different treatment.

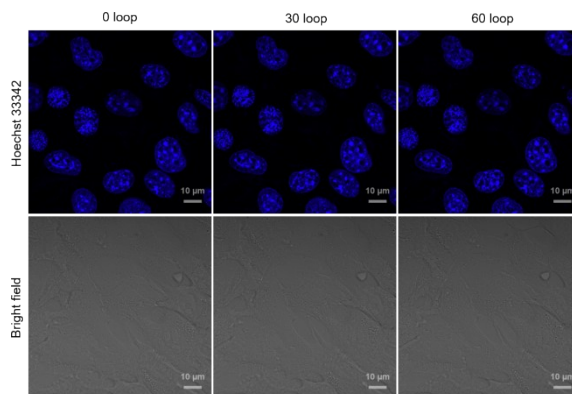

**Fig. S19** CLSM images of 4T1 cells stained with Hoechst 33342 (2 μM) and under continuous 488 nm laser (3% intensity) irradiation for different loops. Scale bar: 10 μm.

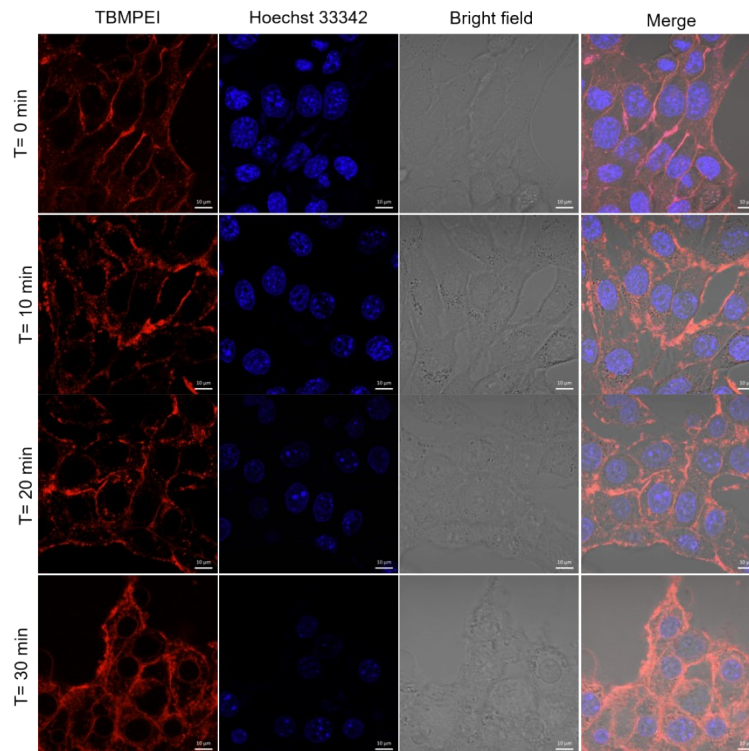

**Fig. S20** CLSM images of 4T1 stained with TBMPEI (10  $\mu$ M) and Hoechst 33342 (2  $\mu$ M) and then irradiated with white LED lamp for various time periods. Scale bar: 10  $\mu$ m.

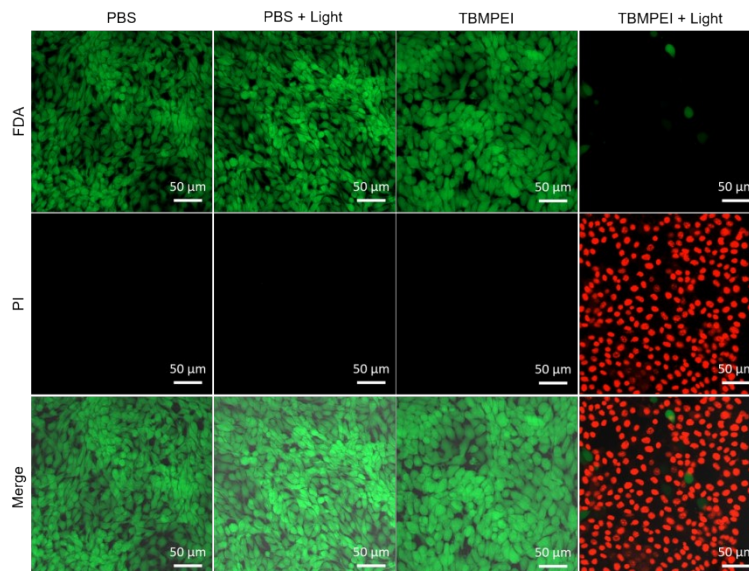

**Fig. S21** Live/dead staining of 4T1 cells by FDA (6  $\mu$ M, green fluorescence) and PI (10  $\mu$ M, red fluorescence) after various treatments. Scale bar: 50  $\mu$ m.

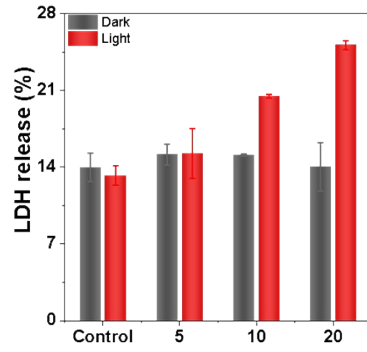

**Fig. S22** LDH release of 4T1 cells after treated with various amounts of TBMPEI, 4T1 cells were chosen as the control.

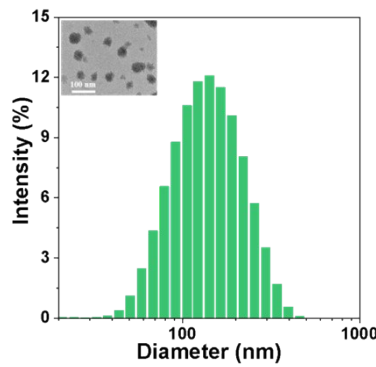

**Fig. S23** Particle size distributions of TBMPEI dots in aqueous solution. Inset: TEM image of TBMPEI dots. Scale bar: 100 nm.

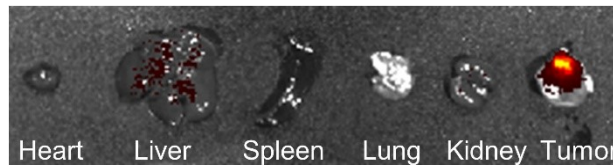

**Fig. S24** *Ex vivo* fluorescence images of tumors and major organs after injection of TBMPEI dots for 24 h.

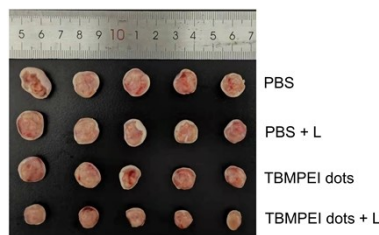

**Fig. S25** Photos of tumor in various group after 14-days treatment.

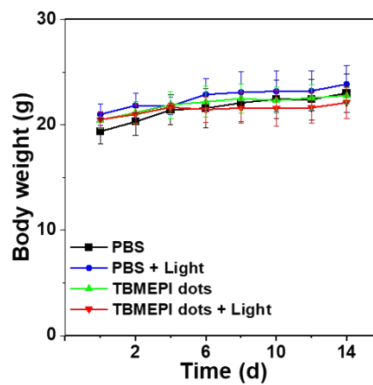

**Fig. S26** Body weights change of mice in different groups during 14-day treatments.

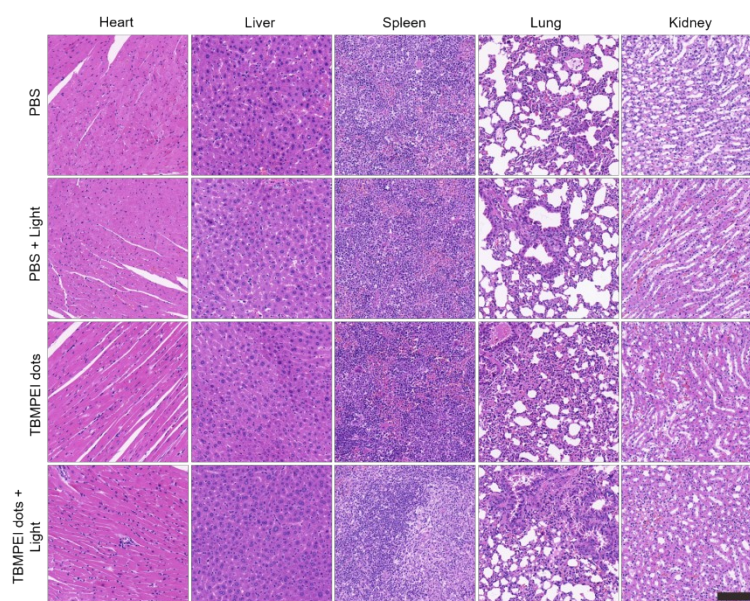

**Fig. S27** H&E-stained images of tissue sections (kidney, lung, spleen, liver, and heart) of mice treated with PBS, PBS + light, TBMPEI dots, and TBMPEI dots + light. Scale bar: 200  $\mu\text{m}$ .

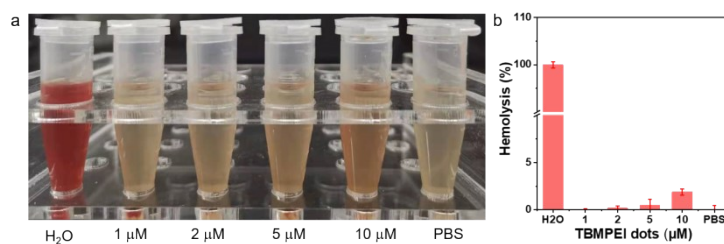

**Fig. S28** Hemolysis assay of TBMPEI dots. (A) Photographs of Hemolysis assay using various materials and (B) corresponding hemolysis rates.

| AlEgens | $\phi_F$          |                   | $\alpha_{\text{AIE}} (I_{\text{aggr,max}}/I_{\text{solu}})$ | $\tau$ [ns] |
|---------|-------------------|-------------------|-------------------------------------------------------------|-------------|
|         | Soln ( $\phi_F$ ) | Aggr ( $\phi_F$ ) |                                                             |             |
| TBMPE   | 1.8%              | 3.6%              | 2                                                           | 1.11        |
| TBMPEI  | 0.4%              | 0.6%              | 1.5                                                         | 2.31        |

**Fig. S29** Fluorescence quantum yield and lifetime of TBMPE and TBMPEI.
